# Supplementary material for: High-resolution structure and biochemical properties of the LH1–RC photocomplex from the model purple sulfur bacterium, Allochromatium vinosum
Source: PubMed Central journal article supplement (PMC10861460; doi:10.1038/s42003-024-05863-w), 2024-02-12
Supplement: 42003_2024_5863_MOESM3_ESM.pdf [file 42003_2024_5863_MOESM3_ESM.pdf]

## **Description of Additional Supplementary Files**

**File name:** Supplementary Data 1

**Description:** The numerical source values underlying Figure 4.
